# Supplementary material for: Phosphoproteomics Reveals HMGA1, a CK2 Substrate, as a Drug-Resistant Target in Non-Small Cell Lung Cancer
Source: PubMed Central journal article supplement (PMC5349541; doi:10.1038/srep44021), 2017-03-14
Supplement: srep44021-s1.pdf [file srep44021-s1.pdf]

# Title: Phosphoproteomics Reveals HMGA1, a CK2 Substrate, as a Drug-Resistant Target in Non-Small Cell Lung Cancer

Yi-Ting Wang , Szu-Hua Pan , Chia-Feng Tsai , Ting-Chun Kuo , Yuan-Ling Hsu, Hsin-Yung Yen,  
Wai-Kok Choong , Hsin-Yi Wu , Yen-Chen Liao, Tse-Ming Hong, Ting-Yi Sung, Pan-Chyr Yang and Yu-Ju Chen

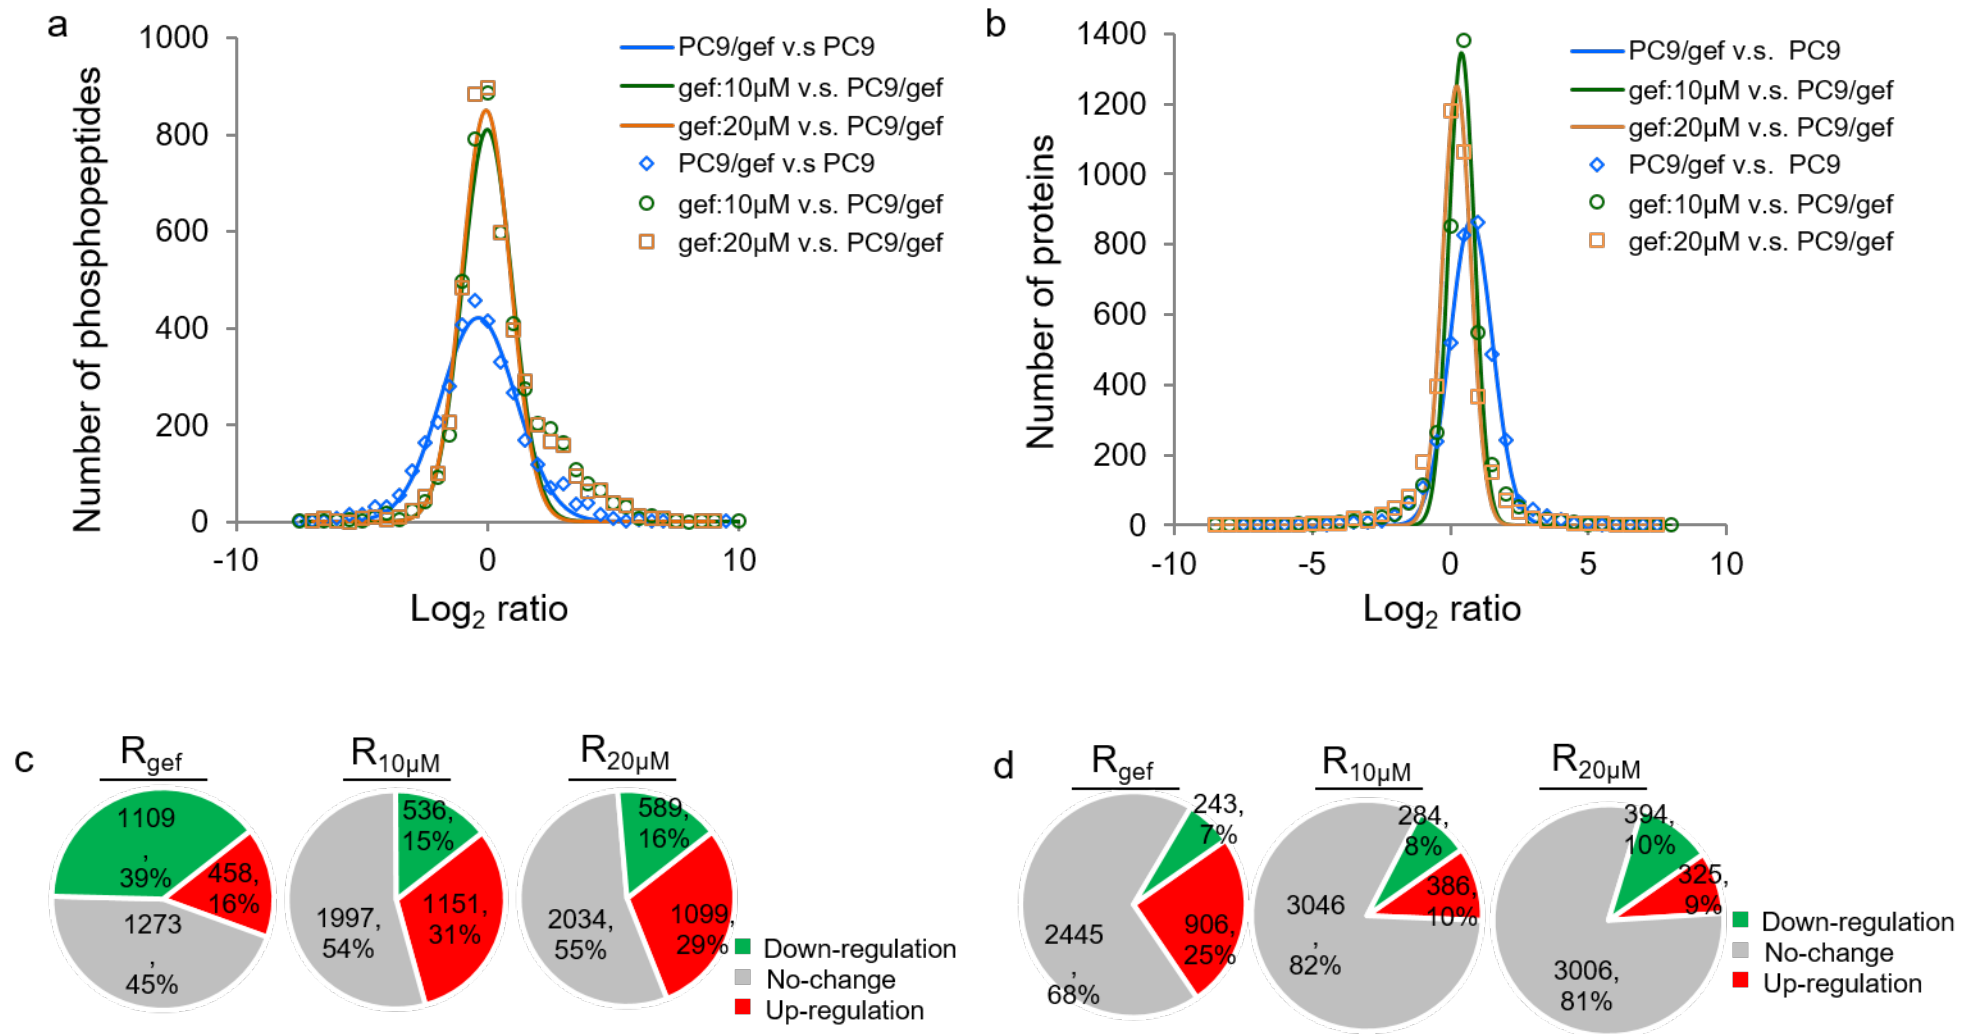

**Supplementary Figure S1. Phosphoproteomics and proteomics analysis of PC9/gef versus PC9, gefitinib 10µM and 20µM treatment of PC9/gef cells compare to PC9/gef.** (a) Log<sub>2</sub> ratios distribution for phosphopeptides analysis. (b) Log<sub>2</sub> ratios distribution for proteins analysis. (c) For phosphoproteomics analysis, pie charts reveal the percentage of 2-fold up-regulation, 2-fold down-regulation and no change of phosphopeptides. (d) For proteomics analysis, pie charts reveal the percentage of 2-fold up-regulation, 2-fold down-regulation and no change of proteins.

a

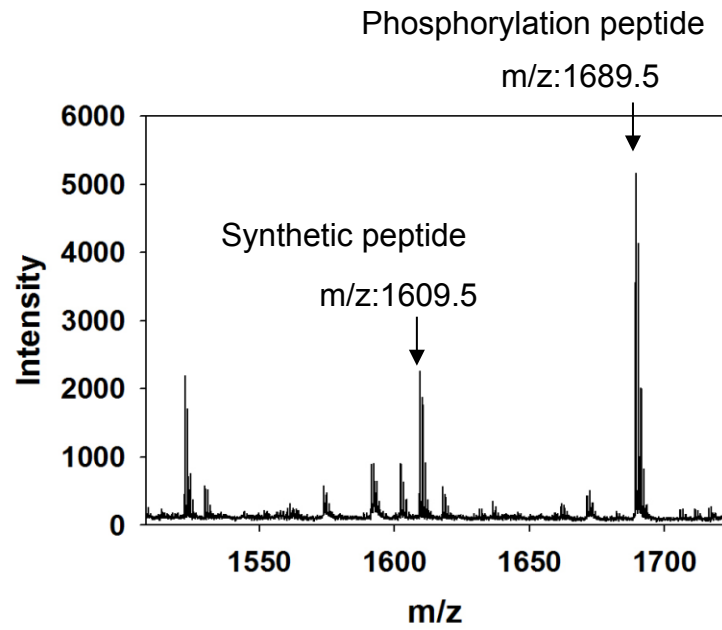

b

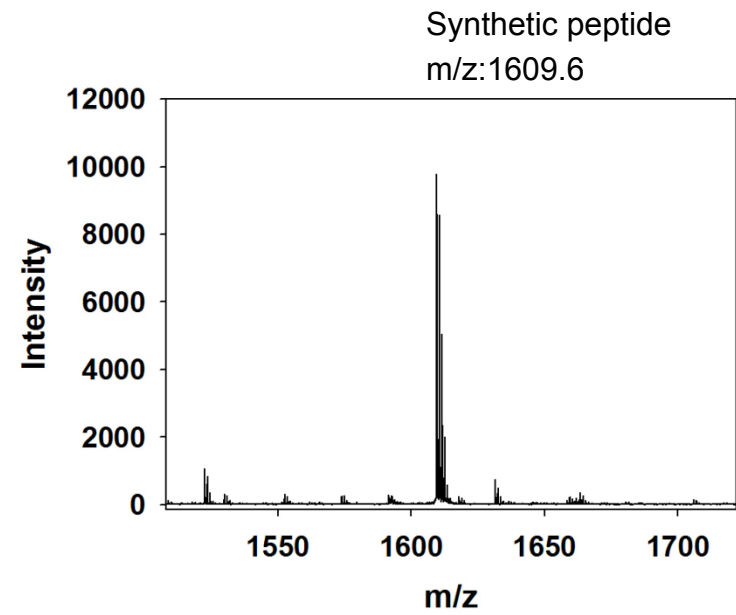

**Supplementary Figure S2. *in vitro* kinase assay for synthetic peptide of HMGA1 and detect by MALDI-TOF MS. (a) *in vitro* kinase assay with CK2 kinase (b). *in vitro* kinase assay with MAP kinase.**

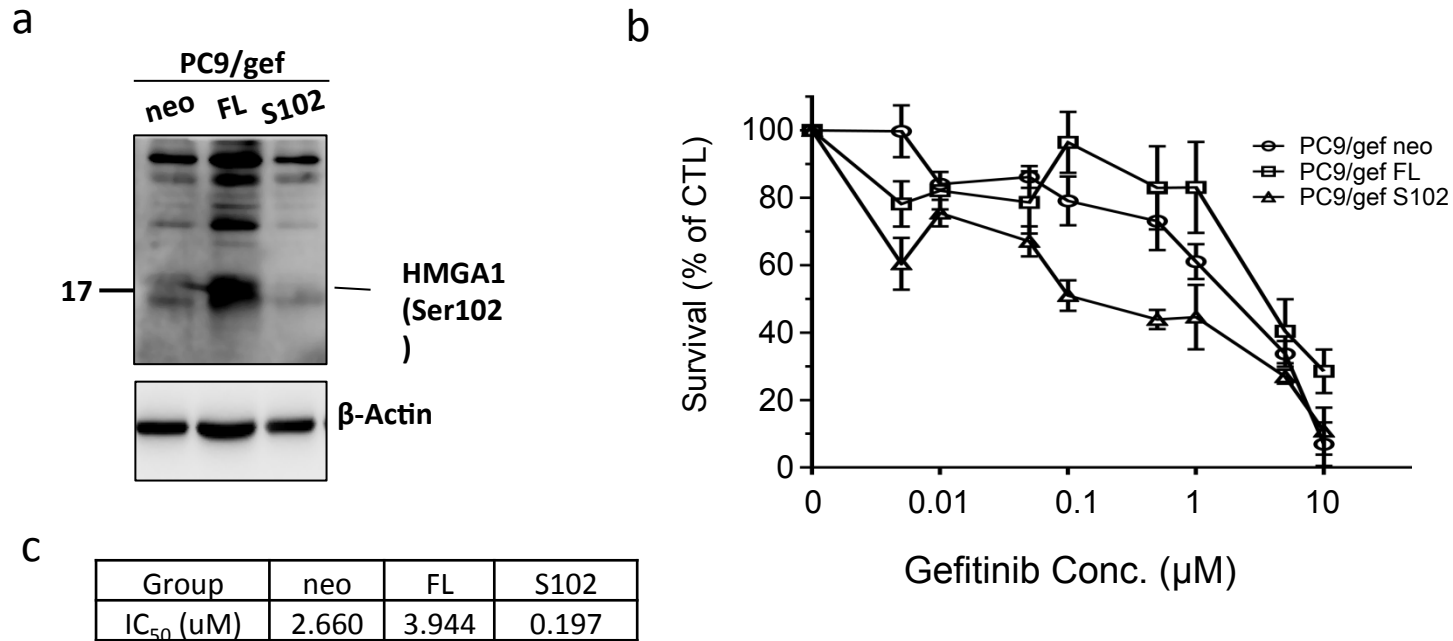

**Supplementary Figure S3. HMGA1 phosphorylated site, S102 regulates drug resistance in NSCLC.**

(a) the efficiency of phosphorylation site mutation was confirmed by western blot in PC9/gef cells (neo: PC9/gef transfected pCneo (vector only) plasmid; FL: PC9/gef transfected pCneo-HMGA1 WT (wild type) plasmid; S102: PC9/gef transfected pCneo- HMGA1 S102 mutant plasmid), respectively. (b) Cytotoxicity assays for various concentrations of gefitinib in HMGA1 phosphorylation mutation in PC9/gef cells in neo, FL and S102 condition. (c) The IC<sub>50</sub> of PC9/gef cells treatment with gefitinib in neo, FL and S102 condition.
